# Supplementary material for: Computational Analysis of the ESX-1 Region of Mycobacterium tuberculosis: Insights into the Mechanism of Type VII Secretion System
Source: PLoS One. 2011 Nov 30;6(11):e27980. doi: 10.1371/journal.pone.0027980 (PMC3227618; doi:10.1371/journal.pone.0027980)
Supplement: Figure S2 — Conserved motifs in some of the ESX-1 secreted proteins and components identified using multiple sequence alignments of the corresponding orthologs. These include the conserved WXG motif in (A) Rv3881c (EspB), (B) Rv3879c, (C) Rv3616c (EspA) and (D) conserved cleavage motif for Rv3883c (MycP1) in Rv3877. (PDF) [file pone.0027980.s002.pdf]

**Figure S2:** Conserved WVG motif in (A) Rv3881c (EspB), (B) Rv3879c, (C) Rv3616c (EspA) and (D) conserved cleavage motif for Rv3883c (MycP1) in Rv3877, identified using multiple sequence alignments of the corresponding orthologs.

```
gi|15611017| [tuberculosis] T-GDQGASLAHFADGWN TFNL TLQGDVKRFRG-FDNWEGDAA TACEASLD 189
gi|31795055| [bovis] T-GDQGASLAHFADGWN TFNL TLQGDVKRFRG-FDNWEGDAA TACEASLD 189
gi|240168361| [kansasii] S-GDQGRSLVD FANA WNDYN FALQGDVKRFRG-FDNWEGDAA TACEASLD 192
gi|183984318| [marinum] NKGDQGKSL LHFADEWTTYAQTIRDSFSR FRE-FEDWDGDAAE TVQDALL 190
gi|118618031| [ulcerans] W-ADNGNS FENFARTWLDYRLKLLEA TDRFGP-FQWWDG EAAAAVEDHFD 192
gi|145221352| [gilvum] E-GDQGASLRAAA TEWTANAARL TEAAIP FEVRMNNWEG/AAEAAYTKLK 197
      * * * * * : * : : * * * : :
```

```
gi|240170251| [kansasii]      EQRLHVFEGGVWSGGAANAANDGLGANIDQLVMLQHHLA TVI TWHRDIAD 100
gi|183984322| [marinum]      QQRLHVFEGGVWSGGAANAANGALGANIDQLMTVDHDLA TVIAWHRYVAD 100
gi|15611015| [tuberculosis]  QQKGHVFEGLWSGGAANAANGALGANINQLMTLQDYLA TVI TWHRIAG 100
gi|31795053| [bovis]        QQKGHVFEGLWSGGAANAANGALGANINQLMTLQDYLA TVI TWHRIAG 100
.*. *****.*****.*****.*.*. *.*****.*.*.*.
```

```
gi|15610752|tuberculosis] PGDGLGSAADKYAGKNRNVHVFQELADLDRQLISLIHDQANAVQTTRD 100
gi|121639535|bovis BCG] PGDGLGSAADKYAGKNRNVHVFQELADLDRQLISLIHDQANAVQTTRD 100
gi|240173316|kansasii] PGDSWQGSAAENYAGKNKQDLNFFQQLAELDRELQQLIADQANAVEKTRD 100
gi|183984137|marinum] PGDGLGSAADHYSGKNRKHVNFKELAELDRELQKL IADQASAVKTTRE 100
gi|15827124|leprae] PGDGLGSAADKYAGQNRKRVDIFQELAELDKELIELIHNQANSVQTTRG 100
*** * ***** * * * * * * * * * * * * * * * * * * * * * * *
```

```
gi|108797054|[MCS] --MTTTAAASTTSSVTPGRPS TTRVTIL TGRMTD LVLPA AAPVETIYIDE 48
gi|119866139|[KMS] -----MTIL TGRMTD LVLPA AAPVETIYIDE 26
gi|126432676|[JLS] -----MTIL TGRMTD LVLPA AAPVETIYIDE 26
gi|118473897|[smegmatis] --MTS TAAAADTSSVTPGRPS TTRVTIL TGKMTD LVLPA TAPIETIYIDE 48
gi|120401109|[vanbaalenii] --MTA TVAPP TSSNVTPGRP TTRVTIL TGRMTD LVLPS AAPITETIYVDE 48
gi|145221359|[gilvum] -----MTIL TGRMTD LVLPS AAPITETIYVDE 26
Rv3877|[tuberculosis] MSAPAVAAGP TAAGATAARPA TTRVTIL TGRMTD LVLPA AVPMETIYIDD 50
gi|31795051|[bovis] MSAPAVAAGP TAAGATAARPA TTRVTIL TGRMTD LVLPA AVPMETIYIDD 50
gi|183178749|[marinum] -----MTD LVLPA AAPMESYVDE 18
gi|15826897|[leprae] MSAPAVTAGPATAGI TPARPSATRV TIL TGKMTD LVLPS TVSIEAYIDE 50
*****.*****.
```
