# Supplementary material for: Computational Analysis of the ESX-1 Region of Mycobacterium tuberculosis: Insights into the Mechanism of Type VII Secretion System
Source: PubMed Central journal article supplement (PMC3227618; doi:10.1371/journal.pone.0027980), 2011-11-30

**Figure S1:** Predicted 3D folds and their location in seven ESX-1 components.

**(1) Rv3868**

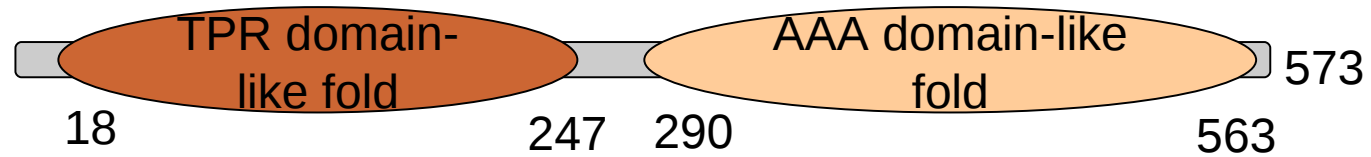

**(2) Rv3876**

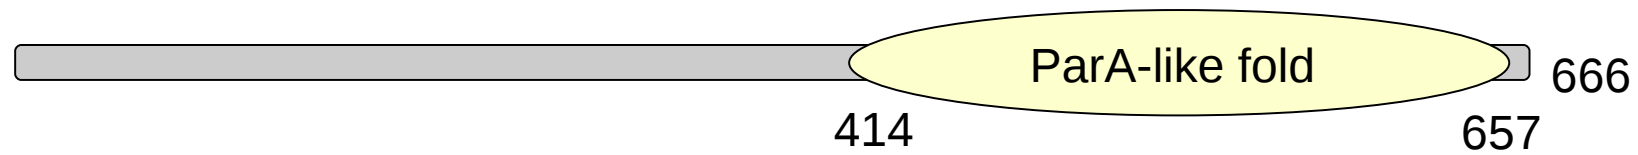

**(3) Rv3877**

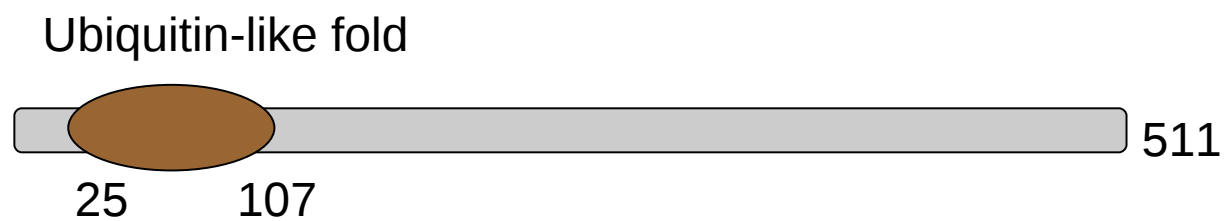

#### (4) Rv3881c (EspB)

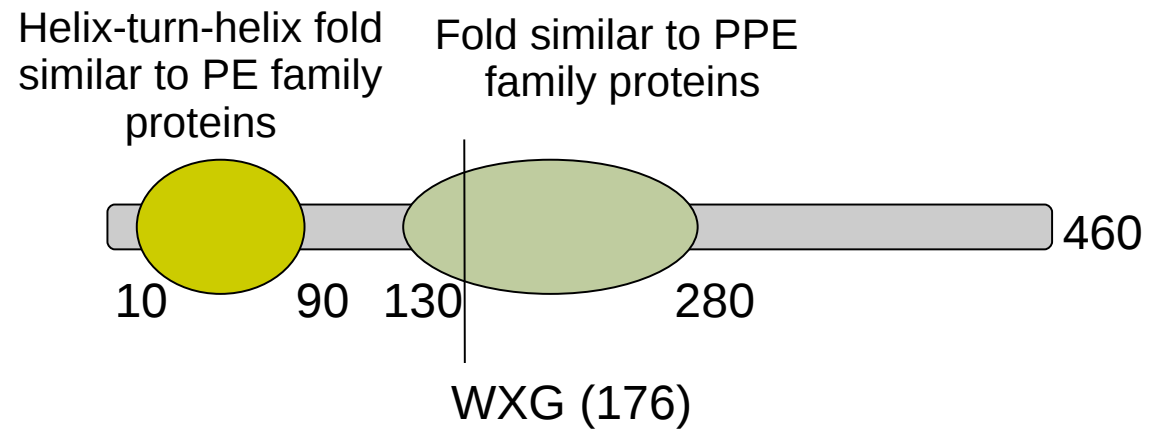

#### (5) Rv3879c

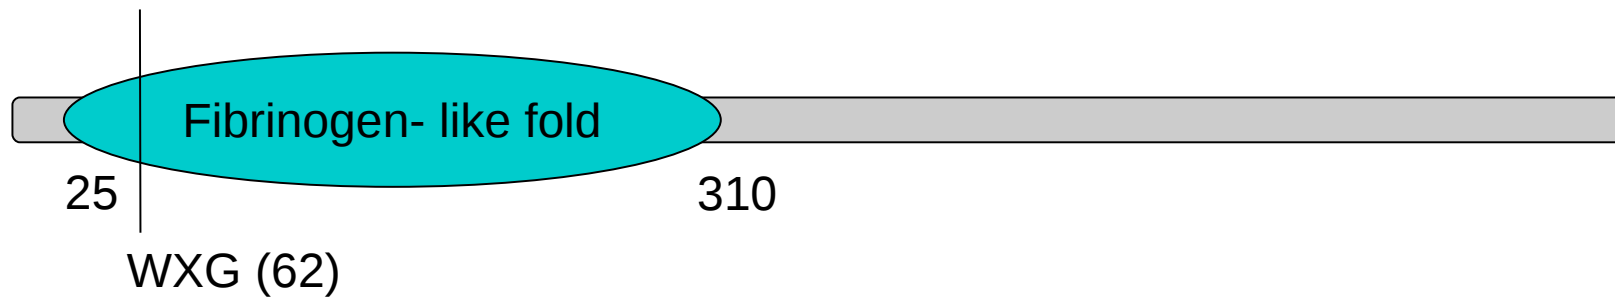

**(6) Rv3615c (EspC)**

ESAT-6-like fold

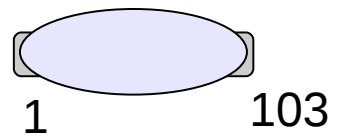

**(7) Rv3616c (EspA)**

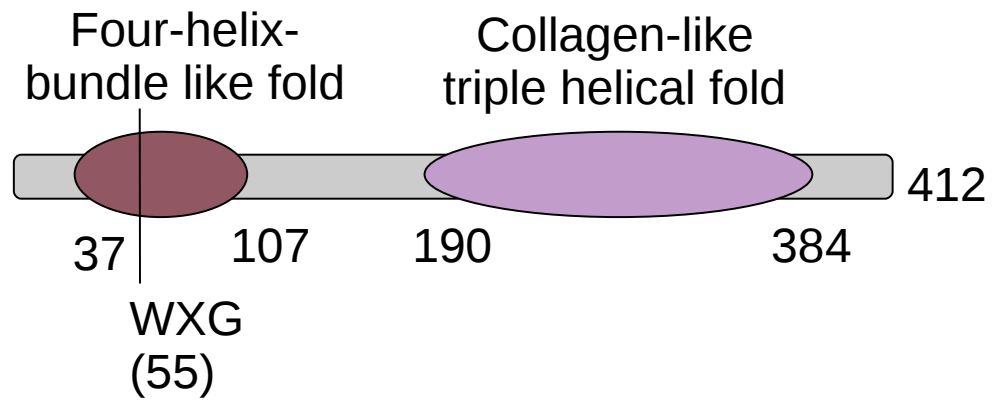

Supplement: pone.0027980.s001.pdf [file pone.0027980.s001.pdf]
