# Supplementary material for: Computational Analysis of the ESX-1 Region of Mycobacterium tuberculosis: Insights into the Mechanism of Type VII Secretion System
Source: PubMed Central journal article supplement (PMC3227618; doi:10.1371/journal.pone.0027980), 2011-11-30
Supplement: pone.0027980.s005.pdf [file pone.0027980.s005.pdf]

**Table S1:** List of mycobacterial species and the number of orthologs of the ESX-1 components\*.

| <b>Organism name</b>                     | <b>Number of orthologs</b> |
|------------------------------------------|----------------------------|
| <i>Mycobacterium tuberculosis</i> H37Rv  | 17                         |
| <i>Mycobacterium bovis</i> AF2122 97     | 17                         |
| <i>Mycobacterium marinum</i> M           | 13                         |
| <i>Mycobacterium leprae</i> Br4923       | 12                         |
| <i>Mycobacterium gilvum</i> PYR GCK      | 12                         |
| <i>Mycobacterium spyr1</i>               | 12                         |
| <i>Mycobacterium kms</i>                 | 11                         |
| <i>Mycobacterium mcs</i>                 | 11                         |
| <i>Mycobacterium smegmatis</i> MC2 155   | 10                         |
| <i>Mycobacterium jls</i>                 | 10                         |
| <i>Mycobacterium vanbaalenii</i> PYR1    | 9                          |
| <i>Mycobacterium avium</i> 104           | 0                          |
| <i>Mycobacterium abscessus</i> ATCC 9977 | 0                          |
| <i>Mycobacterium ulcerans</i> Agy99      | 0                          |

\* Experimentally identified to be associated to ESX-1 secretion pathway of *Mycobacterium tuberculosis* H37Rv.
