# Supplementary material for: Computational Analysis of the ESX-1 Region of Mycobacterium tuberculosis: Insights into the Mechanism of Type VII Secretion System
Source: PubMed Central journal article supplement (PMC3227618; doi:10.1371/journal.pone.0027980), 2011-11-30
Supplement: pone.0027980.s006.pdf [file pone.0027980.s006.pdf]

**Table S2:** Summary of the predicted domains, transmembrane helices, 3D folds, presence of signal peptides and glycosylation sites in ESX-1 components.

| Component       | Length (aa) | Domain      | Probable position of transmembrane helices                                                            | 3D fold                                                                                             | Signal peptide | Probable position of glycosylation site(s) |
|-----------------|-------------|-------------|-------------------------------------------------------------------------------------------------------|-----------------------------------------------------------------------------------------------------|----------------|--------------------------------------------|
| Rv3866          | 283         | DNA-binding | -                                                                                                     | -                                                                                                   | -              | -                                          |
| Rv3868          | 573         | ATP-binding | -                                                                                                     | TPR fold (N- terminal), fold similar to AAA domain (C-terminal)                                     | -              | -                                          |
| Rv3869          | 480         | -           | 40-60                                                                                                 | -                                                                                                   | -              | 144,148,152                                |
| Rv3870          | 747         | FtsK        | 41-64 and 68-92                                                                                       | Fold similar to FtsK domain                                                                         | -              | -                                          |
| Rv3871          | 591         | FtsK        | -                                                                                                     |                                                                                                     |                | -                                          |
| Rv3872          | 99          | PE          | -                                                                                                     | Fold similar to PE family proteins                                                                  | -              | -                                          |
| Rv3873          | 368         | PPE         | -                                                                                                     | Fold similar to PPE family proteins                                                                 | -              | 182, 183, 191, 194, 195, 196, 206, 208     |
| Rv3874 (CFP-10) | 100         | ESAT-6 like | -                                                                                                     | ESAT-6 like fold                                                                                    | -              | -                                          |
| Rv3875 (ESAT-6) | 95          | ESAT-6 like | -                                                                                                     | ESAT-6 like fold                                                                                    | -              | -                                          |
| Rv3876          | 666         | FlhG        | -                                                                                                     | Fold similar to ParA family proteins (C- terminal)                                                  | -              | -                                          |
| Rv3877          | 511         |             | 144-166, 171-190, 197-219, 229-246, 258-280, 284-306, 366-388, 392-414, 419-441, 445-467, and 480-502 | Ubiquitin-like fold (N-terminal)                                                                    | -              | -                                          |
| Rv3883c (MycP1) | 446         | Subtilisin  | 419-439                                                                                               | Fold similar to subtilisin-like serine proteases                                                    | Yes            | -                                          |
| Rv3882c         | 462         | -           | 9-29 and 33-53                                                                                        | -                                                                                                   | Yes            | -                                          |
| Rv3615c (EspC)  | 103         | -           | -                                                                                                     | ESAT-6 like fold                                                                                    | -              | -                                          |
| Rv3616c (EspA)  | 412         | -           | -                                                                                                     | Collagen like triple helical fold (C- terminal)                                                     | -              | -                                          |
| Rv3881c (EspB)  | 460         | -           | -                                                                                                     | Helix-turn-helix fold similar to PE family proteins followed by fold similar to PPE family proteins | -              | -                                          |
| Rv3879c         | 729         | -           | -                                                                                                     | Fibrinogen-like fold                                                                                | -              | -                                          |
