# Supplementary material for: Computational Analysis of the ESX-1 Region of Mycobacterium tuberculosis: Insights into the Mechanism of Type VII Secretion System
Source: PubMed Central journal article supplement (PMC3227618; doi:10.1371/journal.pone.0027980), 2011-11-30
Supplement: pone.0027980.s007.pdf [file pone.0027980.s007.pdf]

Table S3: Details of the genes constituting the compositionally distinct islands that harbor (A) ESX-1 gene cluster and, (B) a part of the MCE Cluster 1 region. The genes of the ESX-1 gene cluster and MCE Cluster 1 region being highlighted in blue and orange respectively.

(A)

| PROTEIN ID | NAME  | ANNOTATION                                                                                                |
|------------|-------|-----------------------------------------------------------------------------------------------------------|
| Rv3864     | -     | hypothetical protein                                                                                      |
| Rv3865     | -     | hypothetical protein                                                                                      |
| Rv3866     | -     | hypothetical protein                                                                                      |
| Rv3867     | -     | hypothetical protein                                                                                      |
| Rv3868     | -     | hypothetical protein                                                                                      |
| Rv3869     | -     | hypothetical protein                                                                                      |
| Rv3870     | -     | transmembrane protein                                                                                     |
| Rv3871     | -     | hypothetical protein                                                                                      |
| Rv3872     | PE35  | PE family-related protein                                                                                 |
| Rv3873     | PPE68 | PPE family protein                                                                                        |
| Rv3874     | esxB  | 10 kDa culture filtrate antigen EsxB                                                                      |
| Rv3875     | esxA  | 6 kDa early secretory antigenic target ESXA (ESAT-6)                                                      |
| Rv3876     | -     | hypothetical protein                                                                                      |
| Rv3877     | -     | transmembrane protein                                                                                     |
| Rv3878     | -     | hypothetical protein                                                                                      |
| Rv3879c    | -     | hypothetical protein                                                                                      |
| Rv3880c    | -     | hypothetical protein                                                                                      |
| Rv3881c    | EspB  | hypothetical protein                                                                                      |
| Rv3882c    | -     | hypothetical protein                                                                                      |
| Rv3883c    | mycP1 | membrane-anchored mycosin MYCP1 (serine protease) (subtilisin-like protease) (subtilase-like) (mycosin-1) |

| PROTEIN ID | NAME  | ANNOTATION                                         |
|------------|-------|----------------------------------------------------|
| Rv3884c    | -     | CBXX/CFQX family protein                           |
| Rv3885c    | -     | hypothetical protein                               |
| Rv3886c    | mycP2 | alanine and proline rich membrane-anchored mycosin |
| Rv3887c    | -     | transmembrane protein                              |
| Rv3888c    | -     | hypothetical protein                               |
| Rv3889c    | -     | hypothetical protein                               |
| Rv3890c    | esxC  | ESAT-6 like protein ESXC (ESAT-6 like protein 11)  |
| Rv3891c    | esxD  | ESAT-6 like protein EsxD                           |
| Rv3892c    | PPE69 | PPE family protein                                 |
| Rv3893c    | PE36  | PE family protein                                  |
| Rv3894c    | -     | hypothetical protein                               |
| Rv3895c    | -     | hypothetical protein                               |
| Rv3896c    | -     | hypothetical protein                               |
| Rv3897c    | -     | hypothetical protein                               |
| Rv3898c    | -     | hypothetical protein                               |
| Rv3899c    | -     | hypothetical protein                               |
| Rv3900c    | -     | hypothetical protein                               |
| Rv3901c    | -     | hypothetical protein                               |
| Rv3902c    | -     | hypothetical protein                               |

**(B)**

| PROTEIN ID | NAME   | ANNOTATION                                                                       |
|------------|--------|----------------------------------------------------------------------------------|
| Rv0152c    | PE2    | PE family protein                                                                |
| Rv0153c    | ptbB   | phosphotyrosine protein phosphatase PTPB (protein-tyrosine-phosphatase) (PTPase) |
| Rv0154c    | fadE2  | acyl-CoA dehydrogenase FADE2                                                     |
| Rv0155     | pntAa  | NAD(P) transhydrogenase subunit alpha                                            |
| Rv0156     | pntAb  | NAD(P) transhydrogenase subunit alpha                                            |
| Rv0157     | pntB   | NAD(P) transhydrogenase subunit beta                                             |
| Rv0158     | -      | TetR family transcriptional regulator                                            |
| Rv0159c    | PE3    | PE family protein                                                                |
| Rv0160c    | PE4    | PE family protein                                                                |
| Rv0161     | -      | oxidoreductase                                                                   |
| Rv0162c    | adhE1  | zinc-type alcohol dehydrogenase E subunit                                        |
| Rv0163     | -      | hypothetical protein                                                             |
| Rv0164     | TB18.5 | hypothetical protein                                                             |
| Rv0165c    | -      | GntR family transcriptional regulator                                            |
| Rv0166     | fadD5  | acyl-CoA synthetase                                                              |
| Rv0167     | yrbE1A | integral membrane protein YRBE1A                                                 |
| Rv0168     | yrbE1B | integral membrane protein YRBE1B                                                 |
| Rv0169     | mce1A  | MCE-family protein MCE1A                                                         |
| Rv0170     | mce1B  | MCE-family protein MCE1B                                                         |
| Rv0171     | mce1C  | MCE-family protein MCE1C                                                         |

| PROTEIN ID | NAME  | ANNOTATION                  |
|------------|-------|-----------------------------|
| Rv0172     | mce1D | MCE-family protein MCE1D    |
| Rv0173     | lprK  | MCE-family lipoprotein LprK |
| Rv0174     | mce1F | MCE-family protein MCE1F    |
