# Supplementary material for: Computational Analysis of the ESX-1 Region of Mycobacterium tuberculosis: Insights into the Mechanism of Type VII Secretion System
Source: PubMed Central journal article supplement (PMC3227618; doi:10.1371/journal.pone.0027980), 2011-11-30
Supplement: pone.0027980.s008.pdf [file pone.0027980.s008.pdf]

**Table S4:** List of gene components experimentally identified to be involved in ESX-1 secretion pathway. The genes and the corresponding protein names are taken from the TubercuList database (<http://tuberculist.epf1.ch/>).

| <b>Gene name</b> | <b>Synonym code</b> | <b>Protein name</b> |
|------------------|---------------------|---------------------|
| espG1            | Rv3866              | EspG1               |
| eccA1            | Rv3868              | EccA1               |
| eccB1            | Rv3869              | EccB1               |
| eccCa1           | Rv3870              | EccCA1              |
| eccCb1           | Rv3871              | EccCB1              |
| PE35             | Rv3872              | -                   |
| PPE68            | Rv3873              | -                   |
| esxB             | Rv3874              | CFP-10              |
| esxA             | Rv3875              | ESAT-6              |
| espI             | Rv3876              | EspI                |
| eccD1            | Rv3877              | EccD1               |
| espK             | Rv3879c             | EspK                |
| mycP1            | Rv3883c             | MycP1               |
| eccE1            | Rv3882c             | EccE1               |
| espB             | Rv3881c             | EspB                |
| espC             | Rv3615c             | EspC                |
| espA             | Rv3616c             | EspA                |
